# Supplementary material for: Determination of Fertility-Related Traits in Muscadine Grape Population
Source: MDPI journal article supplement (doi:10.3390/plants10061175), 2021-06-09
Supplement: s1 [file s1]

| Sample # | Genotype | Species                | Flower Structure         |
|----------|----------|------------------------|--------------------------|
| 1        | A12-9-1  | Muscadine hybrid       | Hermaphroditic (Perfect) |
| 2        | A12-10-2 | Muscadine hybrid       | Hermaphroditic (Perfect) |
| 3        | A13-7-1  | Muscadine hybrid       | Hermaphroditic (Perfect) |
| 4        | A14-13-1 | Muscadine rotundifolia | Hermaphroditic (Perfect) |
| 5        | A14-14-2 | Muscadine rotundifolia | Hermaphroditic (Perfect) |
| 6        | A18-8-2  | Muscadine rotundifolia | Hermaphroditic (Perfect) |
| 7        | A18-15-2 | Muscadine rotundifolia | Hermaphroditic (Perfect) |
| 8        | A19-13-1 | Muscadine rotundifolia | Female                   |
| 9        | A19-13-2 | Muscadine rotundifolia | Hermaphroditic (Perfect) |
| 10       | A20-5-1  | Muscadine rotundifolia | Hermaphroditic (Perfect) |
| 11       | A26-6-1  | Muscadine rotundifolia | Hermaphroditic (Perfect) |
| 12       | A27-4-1  | Muscadine rotundifolia | Hermaphroditic (Perfect) |
| 13       | B20-15-2 | Muscadine rotundifolia | Female                   |
| 14       | B20-18-2 | Muscadine rotundifolia | Hermaphroditic (Perfect) |
| 15       | B25-14-1 | Muscadine rotundifolia | Female                   |
| 16       | C1-3-1   | Muscadine rotundifolia | Female                   |
| 17       | C5-12-1  | Muscadine rotundifolia | Female                   |
| 18       | C6-4-2   | Muscadine rotundifolia | Female                   |
| 19       | C6-13-1  | Muscadine rotundifolia | Hermaphroditic (Perfect) |
| 20       | D6-8-2   | Muscadine rotundifolia | Hermaphroditic (Perfect) |
| 21       | C8-6-1   | Muscadine rotundifolia | Female                   |
| 22       | C8-13-1  | Muscadine rotundifolia | Hermaphroditic (Perfect) |
| 23       | C11-2-2  | Muscadine rotundifolia | Hermaphroditic (Perfect) |
| 24       | C11-4-1  | Muscadine rotundifolia | Hermaphroditic (Perfect) |
| 25       | C11-7-1  | Muscadine rotundifolia | Female                   |
| 26       | C12-10-1 | Muscadine rotundifolia | Hermaphroditic (Perfect) |
| 27       | C13-9-1  | Muscadine rotundifolia | Hermaphroditic (Perfect) |
| 28       | C13-15-2 | Muscadine rotundifolia | Hermaphroditic (Perfect) |
| 29       | D7-1-1   | Muscadine rotundifolia | Hermaphroditic (Perfect) |
| 30       | D7-9-1   | Muscadine rotundifolia | Hermaphroditic (Perfect) |
| 31       | D7-21-1  | Muscadine rotundifolia | Hermaphroditic (Perfect) |
| 32       | E15-10-1 | Muscadine rotundifolia | Female                   |
| 33       | E16-9-1  | Muscadine rotundifolia | Hermaphroditic (Perfect) |
| 34       | E16-10-1 | Muscadine rotundifolia | Female                   |
| 35       | O15-11-1 | Muscadine hybrid       | Hermaphroditic (Perfect) |
| 36       | O15-16-1 | Muscadine hybrid       | Hermaphroditic (Perfect) |
| 37       | O15-17-1 | Muscadine rotundifolia | Hermaphroditic (Perfect) |
| 38       | O16-5-2  | Muscadine hybrid       | Hermaphroditic (Perfect) |
| 39       | O16-9-2  | Muscadine hybrid       | Hermaphroditic (Perfect) |
| 40       | O17-15-1 | Muscadine rotundifolia | Female                   |

|    |              |                        |                          |
|----|--------------|------------------------|--------------------------|
| 41 | O17-16-2-1   | Muscadine rotundifolia | Hermaphroditic (Perfect) |
| 42 | O17-17-1     | Muscadine rotundifolia | Female                   |
| 43 | O17-18-1     | Muscadine rotundifolia | Hermaphroditic (Perfect) |
| 44 | O18-2-1      | Muscadine rotundifolia | Hermaphroditic (Perfect) |
| 45 | O18-9-1      | Muscadine rotundifolia | Hermaphroditic (Perfect) |
| 46 | O18-14-2     | Muscadine rotundifolia | Female                   |
| 47 | O18-17-1     | Muscadine rotundifolia | Hermaphroditic (Perfect) |
| 48 | O19-14-1     | Muscadine rotundifolia | Hermaphroditic (Perfect) |
| 49 | O21-1-2      | Muscadine rotundifolia | Hermaphroditic (Perfect) |
| 50 | O21-3-1      | Muscadine rotundifolia | Hermaphroditic (Perfect) |
| 51 | O21-11-2     | Muscadine hybrid       | Hermaphroditic (Perfect) |
| 52 | O21-13-1     | Muscadine hybrid       | Hermaphroditic (Perfect) |
| 53 | O22-8-2-2    | Muscadine rotundifolia | Hermaphroditic (Perfect) |
| 54 | O22-19-2     | Muscadine rotundifolia | Hermaphroditic (Perfect) |
| 55 | O23-11-2     | Muscadine rotundifolia | Hermaphroditic (Perfect) |
| 56 | O24-19-2     | Muscadine rotundifolia | Female                   |
| 57 | O25-1-1      | Muscadine rotundifolia | Female                   |
| 58 | O28-4-2-2    | Muscadine rotundifolia | Hermaphroditic (Perfect) |
| 59 | O28-8-2      | Muscadine rotundifolia | Female                   |
| 60 | O28-9-2      | Muscadine rotundifolia | Hermaphroditic (Perfect) |
| 61 | O40-21-1     | Muscadine rotundifolia | Hermaphroditic (Perfect) |
| 62 | O41-2-1      | Muscadine rotundifolia | Hermaphroditic (Perfect) |
| 63 | O41-3-1      | Muscadine rotundifolia | Hermaphroditic (Perfect) |
| 64 | O41-5-2      | Muscadine rotundifolia | Hermaphroditic (Perfect) |
| 65 | O42-3-1      | Muscadine rotundifolia | Hermaphroditic (Perfect) |
| 66 | O43-1-1      | Muscadine rotundifolia | Hermaphroditic (Perfect) |
| 67 | O43-16-1     | Muscadine rotundifolia | Hermaphroditic (Perfect) |
| 68 | O44-14-1     | Muscadine rotundifolia | Hermaphroditic (Perfect) |
| 69 | O44-16-3     | Muscadine rotundifolia | Hermaphroditic (Perfect) |
| 70 | Albemarle    | Muscadine rotundifolia | Hermaphroditic (Perfect) |
| 71 | Black Beauty | Muscadine rotundifolia | Female                   |
| 72 | Carlos       | Muscadine rotundifolia | Hermaphroditic (Perfect) |
| 73 | Digby        | Muscadine rotundifolia | Hermaphroditic (Perfect) |
| 74 | Floriana     | Muscadine rotundifolia | Hermaphroditic (Perfect) |
| 75 | Fry          | Muscadine rotundifolia | Female                   |
| 76 | Fry Seedless | Muscadine rotundifolia | Hermaphroditic (Perfect) |
| 77 | Granny Val   | Muscadine rotundifolia | Hermaphroditic (Perfect) |
| 78 | Majesty      | Muscadine rotundifolia | Female                   |
| 79 | Noble        | Muscadine rotundifolia | Hermaphroditic (Perfect) |
| 80 | Onyx         | Muscadine rotundifolia | Female                   |
| 81 | Rosa         | Muscadine rotundifolia | Female                   |

|    |             |                        |                          |
|----|-------------|------------------------|--------------------------|
| 82 | Scarlett    | Muscadine rotundifolia | Female                   |
| 83 | Scuppernong | Muscadine rotundifolia | Female                   |
| 84 | Sugargate   | Muscadine rotundifolia | Female                   |
| 85 | Sugar Pop   | Muscadine rotundifolia | Female                   |
| 86 | Summit      | Muscadine rotundifolia | Female                   |
| 87 | Supreme     | Muscadine rotundifolia | Female                   |
| 88 | Sweet Jenny | Muscadine rotundifolia | Female                   |
| 89 | Watergate   | Muscadine rotundifolia | Hermaphroditic (Perfect) |
| 90 | Welder      | Muscadine rotundifolia | Hermaphroditic (Perfect) |
